# Supplementary material for: An estimate of the prevalence of dementia in Africa: A systematic analysis
Source: PubMed Central journal article supplement (PMC3529309; doi:10.7189/jogh.02.020401), 2012-12
Supplement: jogh-02-020401-s001.pdf [file jogh-02-020401-s001.pdf]

**Online Supplementary Document**

**George-Carey et al. An estimate of the prevalence of dementia in Africa: A systematic analysis**

**Journal of Global Health 2012;2:020401**

**Table w1. Prevalence of dementia in retained studies**

| <b>African region</b> | <b>Article</b>    | <b>Country</b>                   | <b>Method</b>               | <b>Prevalence (%)</b> | <b>95% confidence intervals</b> |
|-----------------------|-------------------|----------------------------------|-----------------------------|-----------------------|---------------------------------|
| Northern              | El Tallawy (2010) | Egypt                            | SSQ, FCA                    | 2.20                  | n/a                             |
|                       | Farrag (1998)     | Egypt                            | SSQ, MMSE, FCA, Lab tests   | 4.50                  | <1                              |
| Western               | Guerchet (2009)   | Benin                            | SSQ, CSI-D, FCA             | 2.60                  | 1.1 – 3.8                       |
|                       | Gureje (2006)     | Nigeria                          | 10WDRT                      | 10.10                 | 8.6 – 11.8                      |
|                       | Hendrie (1995)    | Nigeria                          | SSQ, CSI-D, CERAD           | 2.29                  | 0.0 – 2.24                      |
|                       | Ochayi (2006)     | Nigeria                          | CSI-D                       | 6.40                  | 3.8 – 9.9                       |
|                       | Paraiso (2011)    | Benin                            | SSQ, CSI-D, FCA             | 3.70                  | 2.6 – 4.8                       |
|                       | Yusuf (2011)      | Nigeria                          | SSQ, CSI-D, CERAD, BDS, SDT | 3.79                  | 1.0 – 4.58                      |
| Central               | Guerchet (2010)   | Central African Republic         | SSQ, CSI-D, 5WT, FCA        | 8.10                  | 5.8 – 10.8                      |
|                       |                   | Democratic Republic of the Congo | SSQ, CSI-D, 5WT, FCA        | 6.70                  | 4.7 – 9.2                       |
| Southern              | Ben-Arie (1983)   | South Africa                     | MMSE, PSE, FCA              | 8.60                  | n/a                             |

MMSE – Mini Mental State Examination, PSE – portal-systemic shunt encephalopahty, FCA – Family Caregive Alliance, SSQ – Speech, Spatial and Qualities of Hearing Scale, CSI-D – CommunityScreening Interview for Dementia, 5WT – Five Word Test, 10WDRT – Ten Word Test, CERAD – Consortium to Establish a Registry for Alzheimer Disease, SDT – sibship disequilibrium test, BDS – Blessed Dementia Scale, IADL – Instrumental Activities of Daily Living

**Table w2. Prevalence (%) of dementia subtypes in retained studies**

| Article         | Country                          | Minimum age | Sample size | Subtypes            | Prevalence (%) |
|-----------------|----------------------------------|-------------|-------------|---------------------|----------------|
| Farrag (1998)   | Egypt                            | 60 years    | 2000        | Alzheimer's disease | 2.20           |
|                 |                                  |             |             | Vascular dementia   | 0.45           |
|                 |                                  |             |             | Other               | 0.50           |
| Hendrie (1995)  | Nigeria                          | 65 years    | 2494        | Alzheimer's disease | 0.72           |
|                 |                                  |             |             | Vascular dementia   | 0.32           |
|                 |                                  |             |             | Other               | 0.04           |
| Guerchet (2009) | Benin                            | 65 years    | 502         | Alzheimer's disease | 2.20           |
|                 |                                  |             |             | Vascular dementia   | 0.20           |
|                 |                                  |             |             | Other               | 0.20           |
| Guerchet (2010) | Central African Republic         | 65 years    | 509         | Alzheimer's disease | 6.65           |
|                 |                                  |             |             | Vascular dementia   | 1.41           |
| Guerchet (2010) | Democratic Republic of the Congo | 65 years    | 546         | Alzheimer's disease | 4.62           |
|                 |                                  |             |             | Vascular dementia   | 2.12           |
| Paraiso (2011)  | Benin                            | 65 years    | 1139        | Alzheimer's disease | 2.81           |
|                 |                                  |             |             | Vascular dementia   | 0.80           |
|                 |                                  |             |             | Other               | 0.09           |
| Yusuf (2011)    | Nigeria                          | 65 years    | 322         | Alzheimer's disease | 1.86           |
|                 |                                  |             |             | Vascular dementia   | 0.62           |
|                 |                                  |             |             | Other               | 0.31           |

**Table w3. Full study characteristics**

| Reference         | Country                          | City/Area                      | Period of study             | Setting         | Age group | Population characteristics                                                                  | Study size | Assessor                                                                         |
|-------------------|----------------------------------|--------------------------------|-----------------------------|-----------------|-----------|---------------------------------------------------------------------------------------------|------------|----------------------------------------------------------------------------------|
| Ben-Arie (1983)   | South Africa                     | Cape Town                      | May – June 1982             | Urban           | 65+       | Systematic sampling technique involving houses aged 65+ years                               | 139        | 6 trained interviewers, 15 medical practitioners and 10 psychiatrists            |
| El Tallawy (2010) | Egypt                            | Al Kharga District, New Valley | June 2005 – May 2009        | Urban and Rural | 50+       | Eligible inhabitants who had been living in the area for at least 6 months at time of study | 62,583     | Neurologists                                                                     |
| Farrag (1998)     | Egypt                            | Assiut-Upper                   | May 1993 – August 1994      | Urban and Rural | 60+       | Random sample of all household aged 60+                                                     | 2,000      | Research team chaired by neuropsychiatrist                                       |
| Guerchet (2009)   | Benin                            | Djidja                         | March – April 2007          | Rural           | 65+       | Door-to-door screening in 7 randomly selected neighboured villages                          | 502        | Trained interviewers, neurologist                                                |
| Guerchet (2010)   | Central African Republic         | Bangui                         | September 2008 – March 2009 | Urban           | 65+       | Door-to-door screening                                                                      | 1,016      | Trained interviewers, local neurologists and psychiatrists and an epidemiologist |
|                   | Democratic Republic of the Congo | Brazzaville                    |                             |                 |           |                                                                                             |            |                                                                                  |

|                   |         |                                                          |                                   |       |     |                                                                         |       |                                                   |
|-------------------|---------|----------------------------------------------------------|-----------------------------------|-------|-----|-------------------------------------------------------------------------|-------|---------------------------------------------------|
| Gureje<br>(2006)  | Nigeria | Lagos, Ugun,<br>Osun, Oyo,<br>Ondo, Ekiti,<br>Kog, Kwara | November<br>2003 –<br>August 2004 | Urban | 65+ | Four-stage area probability<br>sampling of households                   | 2,152 | 24 trained interviewers                           |
| Hendrie<br>(1995) | Nigeria | Ibadan                                                   | May 1992 –<br>March 1994          | Urban | 65+ | Door-to-door screening in a<br>geographically defined area              | 2,494 | Trained interviewers                              |
| Ochayi<br>(2006)  | Nigeria | Jos South<br>Local<br>Government<br>Area                 | January –<br>December<br>2002     | Rural | 65+ | Stratified random sampling<br>technique of one street form<br>each ward | 280   | Trained interviewers                              |
| Paraiso<br>(2011) | Benin   | Cotonou                                                  | May –<br>September<br>2008        | Urban | 65+ | People aged 65+ who had<br>lived in Cotonou for at least<br>5 years     | 1,139 | 10 investigators,<br>neurologist, 2<br>physicians |
| Yusuf<br>(2011)   | Nigeria | Zaria                                                    | March –<br>October 2007           | Urban | 65+ | Systematic sampling<br>technique                                        | 322   | Panel of 6 physicians<br>(2 translators)          |

**Table w4. Risk factors for dementia**

| <b>Article</b>    | <b>Date</b>                 | <b>Minimum age</b> | <b>Risk factors</b>                                                                   |
|-------------------|-----------------------------|--------------------|---------------------------------------------------------------------------------------|
| Ben-Arie (1983)   | May – June 1982             | 65 years           | Increasing age, hypertension                                                          |
| El Tallawy (2010) | June 2005 – May 2009        | 50 years           | n/a                                                                                   |
| Farrag (1998)     | May 1993 – August 1994      | 60 years           | Female sex, increasing age (especially 75+ years)                                     |
| Guerchet (2009)   | March – April 2007          | 65 years           | Increasing age, APOE $\epsilon$ 4, depression                                         |
| Guerchet (2010)   | September 2008 – March 2009 | 65 years           | Increasing age, CVD risk factors, hypertension, psychosocial risk factors             |
| Gureje (2006)     | November 2003 – August 2004 | 65 years           | Female sex, increasing age (especially 80+ years), lifetime history of alcohol misuse |
| Hendrie (1995)    | May 1992 – March 1994       | 65 years           | n/a                                                                                   |
| Ochayi (2006)     | January – December 2002     | 65 years           | Female sex, increasing age, low education level, low BMI                              |
| Paraiso (2011)    | May – September 2008        | 65 years           | Female sex, increasing age, urban setting, hypertension, social isolation             |
| Yusuf (2011)      | March – October 2007        | 65 years           | Female sex, increasing age (especially 80+ years), < 6 years of local education       |
